# Supplementary material for: Effect of mitoquinone on liver metabolism and steatosis in obese and diabetic rats
Source: PubMed Central journal article supplement — Pharmacol Res Perspect. 2021 Feb 6;9(1):e00701. doi: 10.1002/prp2.701 (PMC7866483; doi:10.1002/prp2.701), 2021-02-06
Supplement: PRP2-9-e00701-s001.pdf [file PRP2-9-e00701-s001.pdf]

## **Supplemental data**

*Pharmacology, Research & Perspectives*

Effect of Mitoquinone on Liver Metabolism and Steatosis in Obese and Diabetic Rats

Brian D. Fink, Liping Yu, Lawrence Coppey, Alexander Obrosov, Hanna Shevalye, Robert J. Kerns, Mark A. Yorek, William I. Sivitz

## SYNTHESIS OF MITOQ MESYLATE AND PREPARATION OF THE $\beta$ – CYCLODEXTRIN COMPLEX OF MITOQ MESYLATE

### General Methods:

All reagents were purchased from commercial sources and used without further purification. Idebenone was from Brookview Scientific, LLC (Carmel, IN). NMR spectra were obtained using a Bruker Ultrashield 300 MHz instrument at ambient temperature. Chemical shifts are reported in parts per million from low to high field and referenced to residual solvent. Standard abbreviations indicating multiplicity are used as follows: m = multiplet, s = singlet. High resolution mass spectrometry (HRMS) was determined using a Waters Q-ToF Premier mass spectrometer with electrospray ionization (ESI). MitoQ mesylate was purified >95%, as determined by analytical high performance liquid chromatography (HPLC). The analytical HPLC analysis was determined using a Shimadzu system equipped with SPD10A vp photodiode array detector. The system was connected to a Dell Optiplex GX400 PC and controlled by Shimadzu Client/Server Version 7.4 software. A Restek Allure PFP Propyl (150 mm x 4.6 mm) 5  $\mu$ m column was used as stationary phase, while mobile phase consisted of solvent A (water, 0.1% TFA) and solvent B (acetonitrile, 0.1% TFA). Gradient elution used the following program: from t = 0 min [solvent A (0.95 mL/min), solvent B (0.05 mL/min)] to t = 40 min [solvent A (0.05 mL/min), solvent B (0.95 mL/min)].

### Synthesis of MitoQ mesylate:

Methods adapted from previously reported synthesis of MitoQ bromide (S1). Idebenone (**1**) (Scheme S1) (3 g, 8.9 mmol) was dissolved in dichloromethane (50 mL). Triethylamine (2.5 mL, 17.9 mmol) was added to the solution and the resulting mixture stirred in an ice bath for 30 min. Methanesulfonyl chloride (1.4 mL, 18.1 mmol) in dichloromethane (20 mL) was added dropwise and the reaction stirred at room temperature overnight. TLC indicated reaction was complete as observed for disappearance of idebenone. The organic layer was washed with 1 N HCl four times. The organic layer was dried over sodium sulfate and concentrated *in vacuo* to give idebenone mesylate (**2**) in as an orange oil, which was used without further purification. Idebenone mesylate (8.9 mmol, assuming 100 % yield from the previous step) was dissolved in methanol (50 mL) and cooled in an ice-bath under Argon atmosphere. Sodium borohydride (0.84 g, 22.1 mmol) was added to the solution in small portions over 30 min. Effervescence and color change was observed. The reaction was stirred for another 30 min until the solution remains colorless. The reaction was acidified with 1 N HCl and the product extracted with 50 mL chloroform. The organic layer was dried *in vacuo*. The idebenol mesylate (**3**) obtained as a colorless oil was immediately dissolved in dioxane (25 mL). Triphenylphosphine (3.4 g, 13.3 mmol) was added to the solution and the reaction was refluxed under Ar atmosphere for 3 days. The solvent was partially removed under reduced pressure and mitoquinol (**4**) was precipitated by addition of 50 mL diethyl ether. The precipitated product was collected by decantation and further dried under vacuum. The dried precipitate was then dissolved in ethanol and bubbled with air for 48 h to oxidize mitoquinol to mitoquinone. The ethanol was removed *in vacuo* and the product was placed under vacuum overnight to obtain mitoquinone mesylate (**5**) as an orange foam (3.1 g, 51 %).  $^1\text{H}$  NMR (300 MHz,  $\text{CDCl}_3$ )  $\delta$  7.74 (m, 15H), 3.93 (s, 6H), 3.55 (m, 2H), 2.68 (s, 3H), 2.42 (m, 2H), 1.99 (s, 3H), 1.58 (m, 2H), 1.25 (m, 14H). HRMS (ESI) calculated for ( $\text{M}^+$ ) 583.2972, found 583.2991

(S1) 11.Rao, V. A., Klein, S. R., Bonar, S. J., Zielonka, J., Mizuno, N., Dickey, J. S., Keller, P. W., Joseph, J., Kalyanaraman, B., and Shacter, E. (2010) *J Biol Chem* **285**, 34447-34459.

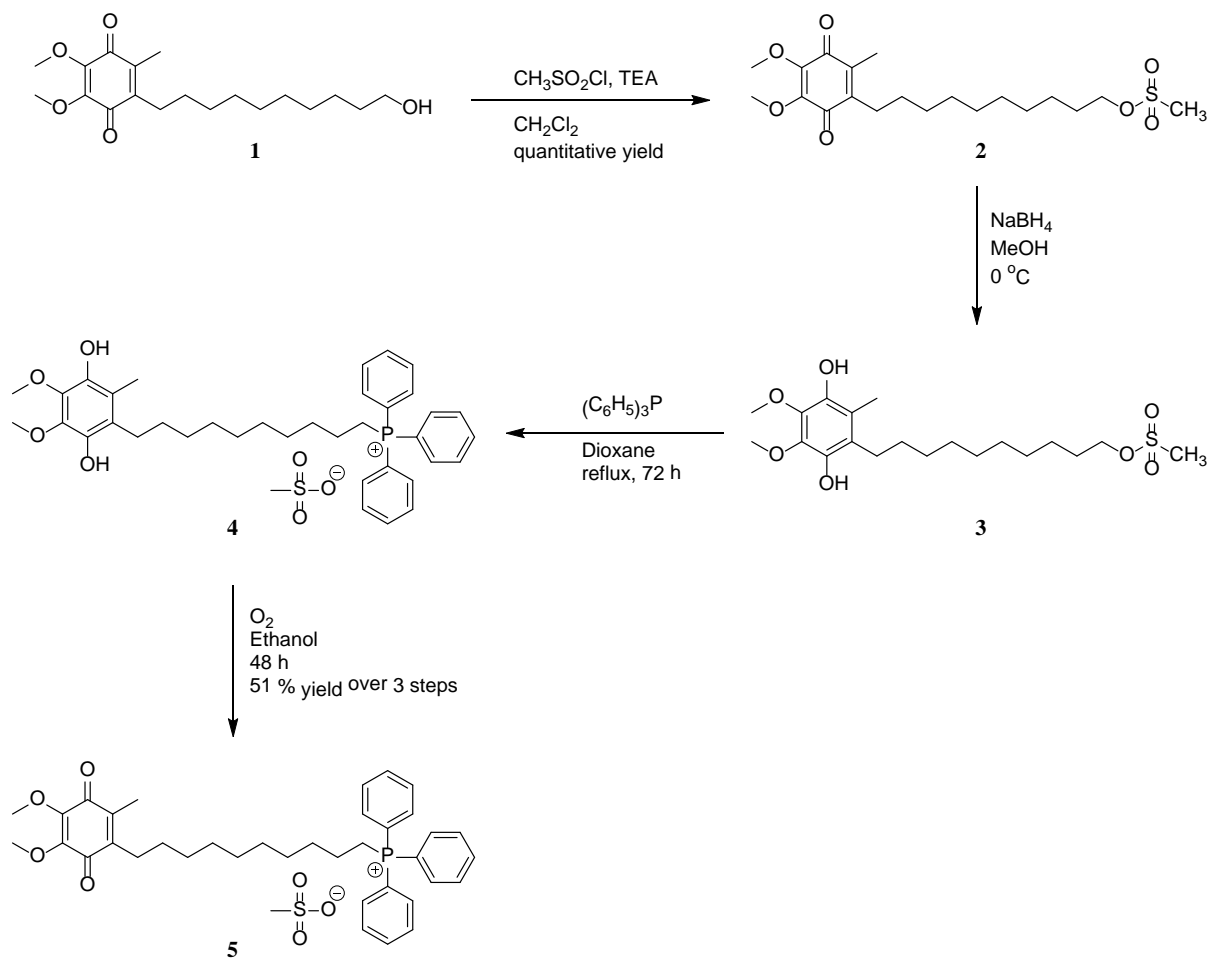

**Scheme S1:** Synthesis of MitoQ mesylate from commercially available Idebenone.

### Preparation of $\beta$ – cyclodextrin complex of MitoQ mesylate:

Mitoquinone mesylate (1.5 g) was dissolved in nanopure water (25 mL) with warming to 40 °C to give a clear orange solution. Beta-cyclodextrin (4.5 g) was separately dissolved in nanopure water (75 mL) with heating to 60 °C to obtain a clear colorless solution. The two solutions were allowed to cool to room temperature, combined and stirred for 1 hour at room temperature. The resulting orange solution was stored in a refrigerator at 5 °C for 12 hours. The solution was then frozen and lyophilized to a constant weight over 2 days to obtain a yellowish-orange free flowing powder. Based on the ratio of MitoQ mesylate and cyclodextrin used, MitoQ constituted 25 % w/w of the complex (250 mg per gm of the complex). The MitoQ ratio in final powder was further confirmed by establishing a standard curve on analytical HPLC using known concentrations of MitoQ mesylate, then determining the amount of MitoQ mesylate in different samples of the MitoQ mesylate-cyclodextrin complex. The experimentally determined level of MitoQ mesylate in the cyclodextrin complex product was found to be within error of the expected level based on ratio of MitoQ mesylate and  $\beta$  – cyclodextrin used.

$^1\text{H}$  NMR of MitoQ mesylate (**5**).

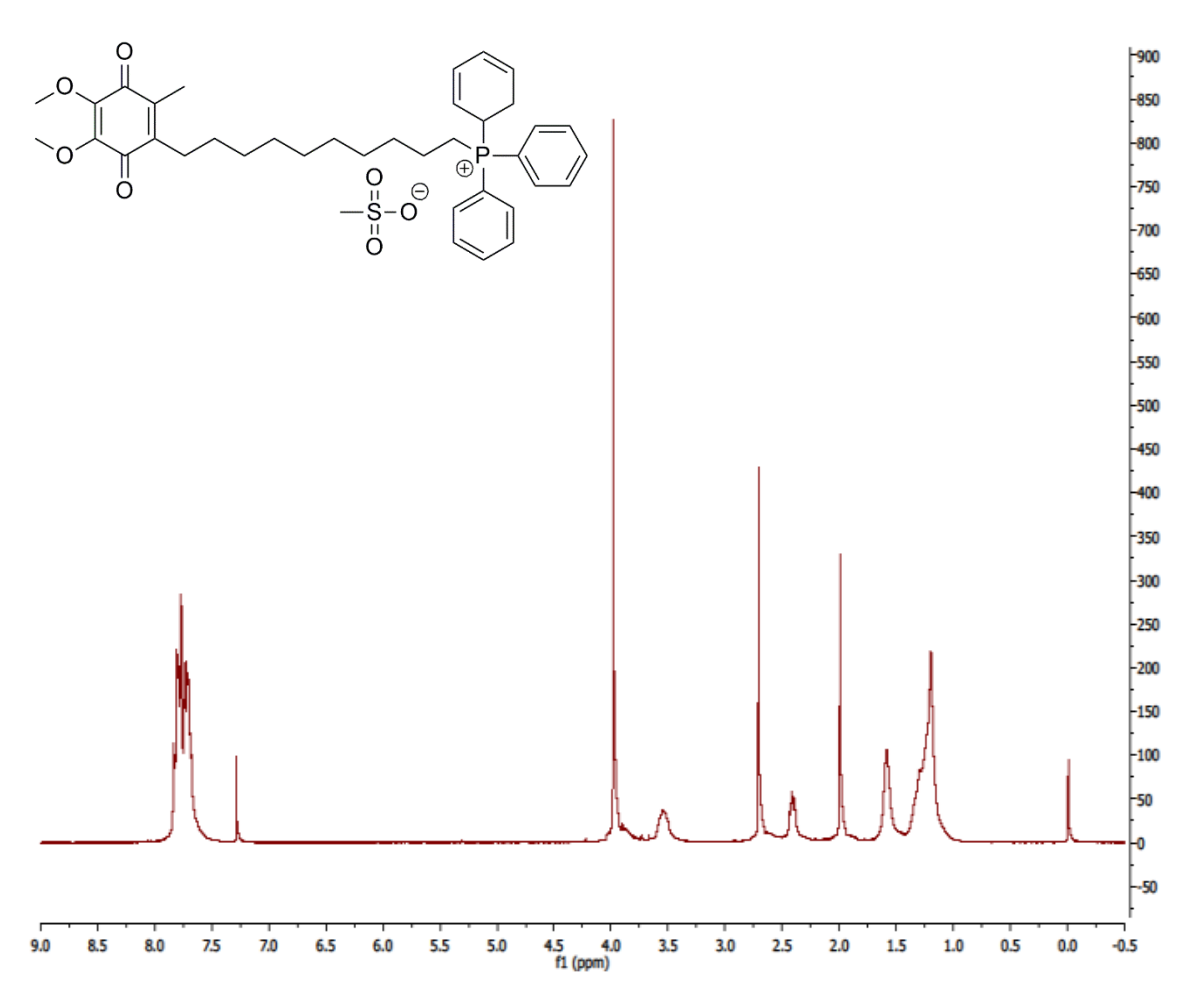

Analytical reversed-phase HPLC of MitoQ mesylate (**5**). Retention time = 32.05 min. Purity >95%. Absorbance wavelength shown = 273 nm.

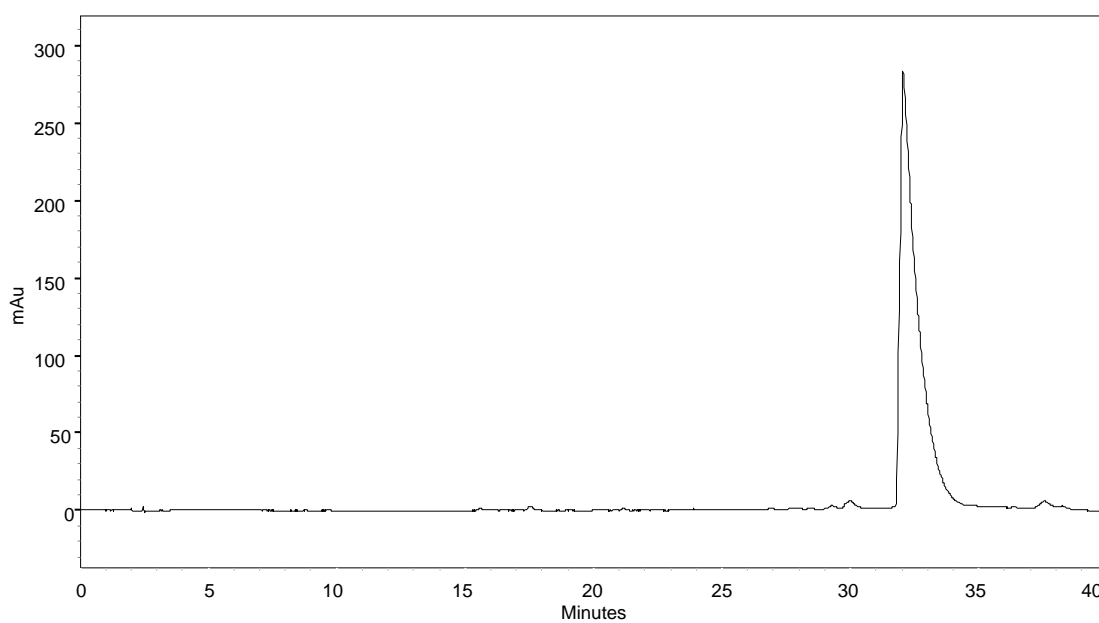

Metabolite data

| SampleD       | class  | Weight         | 1-Octadecanol        | 2-Hydroxybutyrate        | 2-Hydroxyglutarate        | 3-Phosphoglycerate        | 6-Phosphogluconate        | Adenine        | Alanine        |
|---------------|--------|----------------|----------------------|--------------------------|---------------------------|---------------------------|---------------------------|----------------|----------------|
| NC            | Contr  | 38.5           | 30.15077195          | 39.13393114              | 16.20970682               | 15.3723465                | 24.80283371               | 29.51941       | 33.9345        |
| NC            | Contr  | 40             | 24.94522976          | 25.34817572              | 29.00535688               | 19.86225374               | 24.06318135               | 23.25569       | 27.5745        |
| NC            | Contr  | 34.4           | 34.83914958          | 29.16708664              | 30.7434206                | 22.91841202               | 32.20534563               | 25.3347        | 29.7785        |
| NC            | Contr  | 39.3           | 29.6480116           | 24.368988                | 29.57753577               | 13.91063361               | 30.13526406               | 21.59255       | 25.2692        |
|               |        | <b>Mean</b>    | 29.89579072          | 29.50454537              | 26.38400502               | 18.01591147               | 27.80165619               | 24.92559       | 29.1392        |
|               |        | <b>SE</b>      | 2.022194776          | 3.372539928              | 3.410656977               | 2.067309714               | 1.995982146               | 1.711925       | 1.84456        |
|               |        | <b>CV</b>      | 14%                  | 23%                      | 26%                       | 23%                       | 14%                       | 14%            | 13%            |
| DM            | Diabet | 38.3           | 19.6046319           | 35.32139637              | 24.14880195               | 36.46128178               | 23.57223609               | 26.44994       | 8.7774         |
| DM            | Diabet | 38.1           | 23.91524059          | 27.59977797              | 22.01221557               | 40.11091371               | 20.93206138               | 25.79941       | 11.2503        |
| DM            | Diabet | 38.5           | 27.19697069          | 30.64711924              | 27.63079049               | 42.97480846               | 24.7138106                | 28.85526       | 17.5721        |
| DM            | Diabet | 38.3           | 26.1786451           | 31.38243906              | 25.10804913               | 40.71282954               | 21.92118371               | 26.23625       | 17.3784        |
|               |        | <b>Mean</b>    | 24.22387207          | 31.23768316              | 24.72496428               | 40.06495837               | 22.78482295               | 26.83521       | 13.7446        |
|               |        | <b>SE</b>      | 1.685553474          | 1.588521004              | 1.164815742               | 1.350171639               | 0.842595742               | 0.686819       | 2.21263        |
|               |        | <b>CV</b>      | 14%                  | 10%                      | 9%                        | 7%                        | 7%                        | 5%             | 32%            |
| DM-MQ         | Diabet | 37.2           | 27.13728944          | 26.5383413               | 24.13825636               | 41.74728926               | 27.81625367               | 30.93595       | 13.9821        |
| DM-MQ         | Diabet | 36.4           | 27.13599248          | 31.1950647               | 16.29175658               | 50.11267902               | 30.64090601               | 32.63862       | 16.1894        |
| DM-MQ         | Diabet | 38.7           | 25.63679667          | 25.74211906              | 25.84390655               | 32.72943323               | 24.59732457               | 29.34211       | 17.9632        |
|               |        | <b>Mean</b>    | 26.63669286          | 27.82517502              | 22.0913065                | 41.5298005                | 27.68482808               | 30.97223       | 16.0449        |
|               |        | <b>SE</b>      | 0.499948239          | 1.700549892              | 2.941280621               | 5.019288945               | 1.745868805               | 0.951793       | 1.15149        |
|               |        | <b>CV</b>      | 3%                   | 11%                      | 23%                       | 21%                       | 11%                       | 5%             | 12%            |
| HF            | High F | 37.5           | 25.14214864          | 28.58940337              | 24.18979703               | 13.44205064               | 23.37220763               | 19.49358       | 28.1002        |
| HF            | High F | 34.8           | 24.1348977           | 27.97397064              | 18.32108156               | 18.26810869               | 29.35245596               | 26.99486       | 28.6481        |
| HF            | High F | 31.8           | 28.78459871          | 35.27559305              | 39.0680915                | 15.74787697               | 33.7171602                | 24.92948       | 34.4874        |
| HF            | High F | 33.7           | 31.22025041          | 29.25430722              | 18.95908174               | 19.96436796               | 26.76613788               | 22.98753       | 27.1779        |
|               |        | <b>Mean</b>    | 27.32047386          | 30.27331857              | 25.13451296               | 16.85560106               | 28.30199042               | 23.60136       | 29.6034        |
|               |        | <b>SE</b>      | 1.639230382          | 1.687792083              | 4.826971938               | 1.430005496               | 2.181153038               | 1.595055       | 1.65601        |
|               |        | <b>CV</b>      | 12%                  | 11%                      | 38%                       | 17%                       | 15%                       | 14%            | 11%            |
| HF-MQ         | High F | 37.1           | 30.52112136          | 29.86525809              | 32.53873418               | 15.38412879               | 30.77131561               | 28.0266        | 32.0814        |
| HF-MQ         | High F | 39.8           | 34.32515589          | 33.42262742              | 27.82673264               | 20.79108109               | 35.27885418               | 21.34177       | 30.2241        |
| HF-MQ         | High F | 39.8           | 24.21680249          | 29.08837231              | 39.55065649               | 17.32766707               | 31.47561665               | 21.03049       | 29.4021        |
| HF-MQ         | High F | 35.8           | 28.66669917          | 38.14064601              | 24.48229982               | 16.8409303                | 24.46006687               | 24.62699       | 32.5502        |
|               |        | <b>Mean</b>    | 29.43244473          | 32.62922596              | 31.09960578               | 17.58595181               | 30.49646333               | 23.75646       | 31.0645        |
|               |        | <b>SE</b>      | 2.099863677          | 2.06523606               | 3.265881523               | 1.145376444               | 2.242461994               | 1.63945        | 0.74784        |
|               |        | <b>CV</b>      | 14%                  | 13%                      | 21%                       | 13%                       | 15%                       | 14%            | 5%             |
| <b>t-test</b> |        |                |                      |                          |                           |                           |                           |                |                |
|               |        |                | <b>1-Octadecanol</b> | <b>2-Hydroxybutyrate</b> | <b>2-Hydroxyglutarate</b> | <b>3-Phosphoglycerate</b> | <b>6-Phosphogluconate</b> | <b>Adenine</b> | <b>Alanine</b> |
| DM/NC         |        |                | 0.810277015          | 1.058741383              | 0.93711945                | 2.22386519                | 0.819549123               | 1.076613       | 0.47169        |
|               |        | <b>P-value</b> | 0.074638411          | 0.658391441              | 0.661494993               | 0.000110021               | 0.059808865               | 0.340452       | 0.00175        |
| DM-MQ/        |        |                | 0.890984725          | 0.943080962              | 0.837299208               | 2.305173434               | 0.995797801               | 1.242588       | 0.55063        |
|               |        | <b>P-value</b> | 0.237384628          | 0.708158457              | 0.40542481                | 0.00472175                | 0.968070102               | 0.038987       | 0.00274        |
| HF/NC         |        |                | 0.913856874          | 1.026056094              | 0.952642063               | 0.935595243               | 1.017996562               | 0.946873       | 1.01593        |
|               |        | <b>P-value</b> | 0.360713557          | 0.845210044              | 0.839567189               | 0.660633331               | 0.871179054               | 0.591952       | 0.85763        |
| HF-MQ/        |        |                | 0.984501297          | 1.105905058              | 1.178729528               | 0.976134449               | 1.096929734               | 0.953095       | 1.06607        |
|               |        | <b>P-value</b> | 0.878932253          | 0.45953182               | 0.356535698               | 0.861632807               | 0.403955288               | 0.639379       | 0.37076        |
| DM-MQ/        |        |                | 1.099605083          | 0.890756682              | 0.893481837               | 1.036561679               | 1.21505566                | 1.154164       | 1.16737        |
|               |        | <b>P-value</b> | 0.289608381          | 0.207382832              | 0.393295397               | 0.757608818               | 0.039332171               | 0.014966       | 0.44713        |
| HF-MQ/        |        |                | 1.077303596          | 1.077821247              | 1.237326772               | 1.043329855               | 1.077537759               | 1.006572       | 1.04936        |
|               |        | <b>P-value</b> | 0.458085503          | 0.411067283              | 0.345543227               | 0.70396585                | 0.509272921               | 0.948142       | 0.45201        |

| SampleD | class  | Weight        | alpha.Keto.beta.Methylvalerate..KMV. | Arachidic.acid..Eicosanoic.acid. | Arachidonate | Asparagine | Aspartate |
|---------|--------|---------------|--------------------------------------|----------------------------------|--------------|------------|-----------|
| NC      | Contr  | 38.5          | 31.21038522                          | 20.82047209                      | 23.79551582  | 30.0079046 | 16.725594 |
| NC      | Contr  | 40            | 37.36971989                          | 22.91812642                      | 21.5535074   | 21.775129  | 17.362622 |
| NC      | Contr  | 34.4          | 25.86873064                          | 25.15972142                      | 29.94416833  | 26.3666127 | 19.2108   |
| NC      | Contr  | 39.3          | 22.71695437                          | 21.59863598                      | 26.07286949  | 23.4422493 | 11.234413 |
|         |        | <b>Mean</b>   | 29.29144753                          | 22.62423898                      | 25.34151526  | 25.3979739 | 16.133357 |
|         |        | <b>SE</b>     | 3.212991302                          | 0.949582255                      | 1.790214422  | 1.80599894 | 1.7159094 |
|         |        | <b>CV</b>     | 22%                                  | 8%                               | 14%          | 14%        | 21%       |
| DM      | Diabet | 38.3          | 27.21275436                          | 21.94981482                      | 20.03905756  | 29.5235228 | 47.251186 |
| DM      | Diabet | 38.1          | 20.26797668                          | 29.04969411                      | 21.84795335  | 23.1329081 | 31.886777 |
| DM      | Diabet | 38.5          | 23.01897549                          | 26.45151176                      | 22.87896783  | 27.1156781 | 41.071358 |
| DM      | Diabet | 38.3          | 26.27765859                          | 31.4597117                       | 22.82017398  | 32.7820306 | 30.8214   |
|         |        | <b>Mean</b>   | 24.19434128                          | 27.2276831                       | 21.89653818  | 28.1385349 | 37.75768  |
|         |        | <b>SE</b>     | 1.587683119                          | 2.034865387                      | 0.662750948  | 2.03270713 | 3.9124439 |
|         |        | <b>CV</b>     | 13%                                  | 15%                              | 6%           | 14%        | 21%       |
| DM-MQ   | Diabet | 37.2          | 21.44932955                          | 24.72742685                      | 21.84496156  | 27.6846089 | 31.634343 |
| DM-MQ   | Diabet | 36.4          | 26.0565713                           | 26.04244753                      | 24.34045943  | 33.268238  | 44.208532 |
| DM-MQ   | Diabet | 38.7          | 19.42957268                          | 23.52112205                      | 23.30034208  | 35.1252603 | 39.287694 |
|         |        | <b>Mean</b>   | 22.31182451                          | 24.76366548                      | 23.16192102  | 32.0260357 | 38.376856 |
|         |        | <b>SE</b>     | 1.961054211                          | 0.728069472                      | 0.723705212  | 2.23592808 | 3.6583135 |
|         |        | <b>CV</b>     | 15%                                  | 5%                               | 5%           | 12%        | 17%       |
| HF      | High F | 37.5          | 22.82809642                          | 20.01667993                      | 26.65896376  | 18.8326934 | 16.887072 |
| HF      | High F | 34.8          | 29.63173392                          | 24.41140195                      | 29.04587801  | 20.3552938 | 14.645616 |
| HF      | High F | 31.8          | 33.54556632                          | 27.78691727                      | 31.47129703  | 25.438918  | 24.993595 |
| HF      | High F | 33.7          | 22.88698955                          | 25.8153022                       | 26.39089751  | 30.9058471 | 22.42045  |
|         |        | <b>Mean</b>   | 27.22309655                          | 24.50757534                      | 28.39175908  | 23.8831881 | 19.736683 |
|         |        | <b>SE</b>     | 2.644065808                          | 1.649283278                      | 1.187344804  | 2.73391615 | 2.395777  |
|         |        | <b>CV</b>     | 19%                                  | 13%                              | 8%           | 23%        | 24%       |
| HF-MQ   | High F | 37.1          | 28.23928244                          | 19.83782071                      | 29.823279    | 28.286558  | 21.92723  |
| HF-MQ   | High F | 39.8          | 24.39318128                          | 25.13877673                      | 30.99012023  | 22.8180098 | 23.918    |
| HF-MQ   | High F | 39.8          | 27.38494958                          | 24.37444657                      | 29.58429115  | 25.5666205 | 22.641073 |
| HF-MQ   | High F | 35.8          | 25.54920326                          | 21.90803349                      | 26.7354621   | 21.2775196 | 20.279941 |
|         |        | <b>Mean</b>   | 26.39165414                          | 22.81476938                      | 29.28328812  | 24.487177  | 22.191561 |
|         |        | <b>SE</b>     | 0.871013941                          | 1.208235506                      | 0.903091276  | 1.54619193 | 0.7586618 |
|         |        | <b>CV</b>     | 7%                                   | 11%                              | 6%           | 13%        | 7%        |
|         |        | <b>t-test</b> |                                      |                                  |              |            |           |
|         |        |               | alpha.Keto.beta.Methylvalerate..KMV. | Arachidic.acid..Eicosanoic.acid. | Arachidonate | Asparagine | Aspartate |
| DM/NC   |        |               | 0.825986536                          | 1.203473988                      | 0.864057968  | 1.10790471 | 2.3403486 |
| P-value |        |               | 0.204797837                          | 0.086235788                      | 0.121171089  | 0.35240996 | 0.0023069 |
| DM-MQ/  |        |               | 0.761718057                          | 1.094563468                      | 0.913991164  | 1.26096813 | 2.3787272 |
| P-value |        |               | 0.152675121                          | 0.154994                         | 0.367920687  | 0.06689507 | 0.0017708 |
| HF/NC   |        |               | 0.929387205                          | 1.083244186                      | 1.120365487  | 0.940358   | 1.2233463 |
| P-value |        |               | 0.636823521                          | 0.36057964                       | 0.20544003   | 0.6601502  | 0.2672662 |
| HF-MQ/  |        |               | 0.901002045                          | 1.008421516                      | 1.15554606   | 0.96413899 | 1.3755079 |
| P-value |        |               | 0.417196538                          | 0.905376994                      | 0.09690345   | 0.71485406 | 0.0179314 |
| DM- MQ, |        |               | 0.922191857                          | 0.909503221                      | 1.057789173  | 1.13815577 | 1.0163987 |
| P-value |        |               | 0.484406317                          | 0.366686036                      | 0.257619135  | 0.25806525 | 0.9155043 |
| HF-MQ/  |        |               | 0.969458198                          | 0.930927236                      | 1.031400979  | 1.02528929 | 1.1243815 |
| P-value |        |               | 0.775267444                          | 0.439365469                      | 0.571934466  | 0.85385033 | 0.3663644 |

| SampleD       | class          | Weight      | beta.Alanine        | $\beta$ -Hydroxy.beta.Methylbutyric.acid      | $\beta$ -Hydroxybutyrate..3.Hydroxybutyrate     | Cholesterol        | Citrate        |
|---------------|----------------|-------------|---------------------|-----------------------------------------------|-------------------------------------------------|--------------------|----------------|
| NC            | Contrc         | 38.5        | 20.53511262         | 15.70080091                                   | 6.065619916                                     | 27.85244361        | 19.605         |
| NC            | Contrc         | 40          | 15.7315078          | 16.55483699                                   | 3.905838737                                     | 26.40696457        | 24.055         |
| NC            | Contrc         | 34.4        | 19.01045874         | 18.13729414                                   | 3.397125565                                     | 26.73831461        | 23.859         |
| NC            | Contrc         | 39.3        | 16.57481269         | 15.22891845                                   | 3.935315317                                     | 22.60598183        | 20.308         |
|               |                | <b>Mean</b> | 17.96297296         | 16.40546262                                   | 4.325974884                                     | 25.90092616        | 21.957         |
|               |                | <b>SE</b>   | 1.103764566         | 0.639163347                                   | 0.592892287                                     | 1.140992724        | 1.1643         |
|               |                | <b>CV</b>   | 12%                 | 8%                                            | 27%                                             | 9%                 | 11%            |
| DM            | Diabel         | 38.3        | 26.01141786         | 41.8229682                                    | 56.14868859                                     | 27.66583916        | 25.899         |
| DM            | Diabel         | 38.1        | 22.56429021         | 41.04927286                                   | 66.24694085                                     | 26.56405599        | 28.291         |
| DM            | Diabel         | 38.5        | 28.15181736         | 34.54459705                                   | 64.46368186                                     | 27.8375619         | 29.659         |
| DM            | Diabel         | 38.3        | 24.53604295         | 34.80945807                                   | 52.0891087                                      | 26.27756136        | 21.867         |
|               |                | <b>Mean</b> | 25.31589209         | 38.05657405                                   | 59.737105                                       | 27.0862546         | 26.429         |
|               |                | <b>SE</b>   | 1.179890737         | 1.958309554                                   | 3.367579142                                     | 0.390198353        | 1.7076         |
|               |                | <b>CV</b>   | 9%                  | 10%                                           | 11%                                             | 3%                 | 13%            |
| DM-MQ         | Diabel         | 37.2        | 29.47866612         | 45.45777523                                   | 63.16880408                                     | 30.27746595        | 22.452         |
| DM-MQ         | Diabel         | 36.4        | 22.88291331         | 29.53389927                                   | 33.05670484                                     | 29.01235401        | 26.716         |
| DM-MQ         | Diabel         | 38.7        | 25.04559092         | 25.09387909                                   | 21.39563781                                     | 23.5566349         | 30.87          |
|               |                | <b>Mean</b> | 25.80239012         | 33.3618512                                    | 39.20704891                                     | 27.61548496        | 26.68          |
|               |                | <b>SE</b>   | 1.941266556         | 6.182285945                                   | 12.44480352                                     | 2.062023671        | 2.4302         |
|               |                | <b>CV</b>   | 13%                 | 32%                                           | 55%                                             | 13%                | 16%            |
| HF            | High F         | 37.5        | 17.68787839         | 15.29701479                                   | 3.089352648                                     | 24.70386186        | 26.391         |
| HF            | High F         | 34.8        | 18.1315053          | 18.23060361                                   | 3.135502263                                     | 26.6169556         | 24.988         |
| HF            | High F         | 31.8        | 18.74788317         | 20.94716451                                   | 2.838972192                                     | 27.73932287        | 36.888         |
| HF            | High F         | 33.7        | 18.84561776         | 17.34216982                                   | 3.628873717                                     | 21.3592535         | 28.722         |
|               |                | <b>Mean</b> | 18.35322116         | 17.95423818                                   | 3.173175205                                     | 25.10484846        | 29.247         |
|               |                | <b>SE</b>   | 0.272343446         | 1.171517878                                   | 0.165277106                                     | 1.396936984        | 2.6608         |
|               |                | <b>CV</b>   | 3%                  | 13%                                           | 10%                                             | 11%                | 18%            |
| HF-MQ         | High F         | 37.1        | 21.67314178         | 17.86116759                                   | 4.48711156                                      | 27.82101023        | 24.286         |
| HF-MQ         | High F         | 39.8        | 17.73462905         | 13.50815048                                   | 4.043237849                                     | 28.01708347        | 18.73          |
| HF-MQ         | High F         | 39.8        | 19.3440495          | 17.82727414                                   | 3.515525508                                     | 26.00916814        | 28.137         |
| HF-MQ         | High F         | 35.8        | 17.80067998         | 17.11211374                                   | 4.556198287                                     | 23.27290137        | 20.196         |
|               |                | <b>Mean</b> | 19.13812508         | 16.57717649                                   | 4.150518301                                     | 26.2800408         | 22.837         |
|               |                | <b>SE</b>   | 0.923186285         | 1.037483164                                   | 0.240242276                                     | 1.099551559        | 2.122          |
|               |                | <b>CV</b>   | 10%                 | 13%                                           | 12%                                             | 8%                 | 19%            |
| <b>t-test</b> |                |             |                     |                                               |                                                 |                    |                |
|               |                |             | <b>beta.Alanine</b> | <b>beta.Hydroxy.beta.Methylbutyric.acid..</b> | <b>beta.Hydroxybutyrate..3.Hydroxybutyrate.</b> | <b>Cholesterol</b> | <b>Citrate</b> |
|               | <b>DM/NC</b>   |             | 1.409337538         | 2.31975013                                    | 13.80893477                                     | 1.045763941        | 1.2037         |
|               | <b>P-value</b> |             | 0.003887885         | 4.35773E-05                                   | 3.51268E-06                                     | 0.363584324        | 0.0737         |
|               | <b>DM-MQ/</b>  |             | 1.436420918         | 2.03358186                                    | 9.063170721                                     | 1.066196814        | 1.2151         |
|               | <b>P-value</b> |             | 0.013137349         | 0.022854867                                   | 0.020496694                                     | 0.469249067        | 0.1125         |
|               | <b>HF/NC</b>   |             | 1.021725145         | 1.094406089                                   | 0.733516789                                     | 0.969264509        | 1.332          |
|               | <b>P-value</b> |             | 0.743106137         | 0.289915033                                   | 0.110226438                                     | 0.674412495        | 0.0459         |
|               | <b>HF-MQ/</b>  |             | 1.065420803         | 1.010466871                                   | 0.959441146                                     | 1.014637108        | 1.0401         |
|               | <b>P-value</b> |             | 0.445321152         | 0.892549201                                   | 0.793073802                                     | 0.818872412        | 0.7285         |
|               | <b>DM- MQ,</b> |             | 1.0192171           | 0.876638322                                   | 0.656326565                                     | 1.019538706        | 1.0095         |
|               | <b>P-value</b> |             | 0.829300294         | 0.445213291                                   | 0.124903851                                     | 0.778888544        | 0.9337         |
|               | <b>HF-MQ/</b>  |             | 1.042766548         | 0.92330158                                    | 1.308001618                                     | 1.04681137         | 0.7808         |
|               | <b>P-value</b> |             | 0.445960296         | 0.412722614                                   | 0.015388628                                     | 0.533125936        | 0.1086         |



| SampleD        | class  | Weight      | Cysteine        | Cytidine        | Dihydroxyacetone.phosphate               | Fructose        | Fructose.6.phosphate        | Fumarate        |
|----------------|--------|-------------|-----------------|-----------------|------------------------------------------|-----------------|-----------------------------|-----------------|
| NC             | Contra | 38.5        | 29.34634        | 28.7455         | 48.72204124                              | 25.61569        | 51.14836423                 | 20.107868       |
| NC             | Contra | 40          | 26.69439        | 36.51765        | 35.8741456                               | 17.00889        | 35.76979103                 | 21.258384       |
| NC             | Contra | 34.4        | 21.15482        | 18.83508        | 38.19272329                              | 22.00072        | 40.73768214                 | 24.566052       |
| NC             | Contra | 39.3        | 19.27526        | 34.42311        | 31.38234432                              | 13.60269        | 20.78045415                 | 18.767248       |
|                |        | <b>Mean</b> | 24.1177         | 29.63034        | 38.54281361                              | 19.557          | 37.10907289                 | 21.174888       |
|                |        | <b>SE</b>   | 2.348863        | 3.955232        | 3.675746497                              | 2.655594        | 6.31589247                  | 1.2396986       |
|                |        | <b>CV</b>   | 19%             | 27%             | 19%                                      | 27%             | 34%                         | 12%             |
| DM             | Diabet | 38.3        | 25.70519        | 46.87687        | 13.68231277                              | 23.34386        | 20.94632939                 | 17.825311       |
| DM             | Diabet | 38.1        | 23.54791        | 21.12682        | 18.93743138                              | 30.24153        | 20.09154252                 | 25.269447       |
| DM             | Diabet | 38.5        | 23.89061        | 37.88843        | 18.12389447                              | 26.85022        | 24.86535268                 | 38.156798       |
| DM             | Diabet | 38.3        | 25.94873        | 27.5974         | 23.03314014                              | 35.4821         | 23.95490488                 | 32.696845       |
|                |        | <b>Mean</b> | 24.77311        | 33.37238        | 18.44419469                              | 28.97943        | 22.46453237                 | 28.4871         |
|                |        | <b>SE</b>   | 0.614462        | 5.672082        | 1.916590168                              | 2.584743        | 1.151852475                 | 4.4276787       |
|                |        | <b>CV</b>   | 5%              | 34%             | 21%                                      | 18%             | 10%                         | 31%             |
| DM-MQ          | Diabet | 37.2        | 24.13925        | 19.37546        | 13.03471864                              | 24.18353        | 23.39985026                 | 29.870395       |
| DM-MQ          | Diabet | 36.4        | 25.34807        | 19.87556        | 19.81349675                              | 29.59021        | 17.97980929                 | 37.550591       |
| DM-MQ          | Diabet | 38.7        | 24.37609        | 32.18684        | 16.15955349                              | 34.22257        | 18.54747856                 | 39.020763       |
|                |        | <b>Mean</b> | 24.62114        | 23.81262        | 16.33592296                              | 29.3321         | 19.9757127                  | 35.480583       |
|                |        | <b>SE</b>   | 0.369841        | 4.189599        | 1.958850665                              | 2.900895        | 1.719893467                 | 2.8370177       |
|                |        | <b>CV</b>   | 3%              | 30%             | 21%                                      | 17%             | 15%                         | 14%             |
| HF             | High F | 37.5        | 21.2441         | 14.16453        | 21.53034589                              | 14.64015        | 19.28296873                 | 16.432363       |
| HF             | High F | 34.8        | 19.42349        | 20.16747        | 37.00184303                              | 17.45331        | 32.4224475                  | 18.372042       |
| HF             | High F | 31.8        | 22.92741        | 16.62057        | 33.11474925                              | 14.61299        | 24.007253                   | 26.711065       |
| HF             | High F | 33.7        | 28.22397        | 14.99528        | 35.53456366                              | 18.88164        | 24.36125323                 | 21.312837       |
|                |        | <b>Mean</b> | 22.95474        | 16.48696        | 31.79537546                              | 16.39702        | 25.01848062                 | 20.707077       |
|                |        | <b>SE</b>   | 1.896523        | 1.32862         | 3.514261567                              | 1.062953        | 2.725945574                 | 2.2386822       |
|                |        | <b>CV</b>   | 17%             | 16%             | 22%                                      | 13%             | 22%                         | 22%             |
| HF-MQ          | High F | 37.1        | 29.26792        | 19.80629        | 23.52991634                              | 23.23303        | 27.48894143                 | 21.415168       |
| HF-MQ          | High F | 39.8        | 22.64259        | 36.98976        | 15.34485107                              | 21.85125        | 28.95782803                 | 24.954195       |
| HF-MQ          | High F | 39.8        | 27.26808        | 46.69346        | 21.21460187                              | 50.79956        | 18.59854134                 | 22.18463        |
| HF-MQ          | High F | 35.8        | 21.24192        | 14.96704        | 24.89003196                              | 18.74689        | 24.53694005                 | 22.232343       |
|                |        | <b>Mean</b> | 25.10513        | 29.61414        | 21.24485031                              | 28.65768        | 24.89556271                 | 22.696584       |
|                |        | <b>SE</b>   | 1.892873        | 7.398393        | 2.107917259                              | 7.439987        | 2.291446069                 | 0.775481        |
|                |        | <b>CV</b>   | 15%             | 50%             | 20%                                      | 52%             | 18%                         | 7%              |
| <b>t-test</b>  |        |             |                 |                 |                                          |                 |                             |                 |
|                |        |             | <b>Cysteine</b> | <b>Cytidine</b> | <b>Dihydroxyacetone.phosphate..DHAP.</b> | <b>Fructose</b> | <b>Fructose.6.phosphate</b> | <b>Fumarate</b> |
| <b>DM/NC</b>   |        |             | 1.027175        | 1.126291        | 0.478537838                              | 1.481793        | 0.605364958                 | 1.3453247       |
| <b>P-value</b> |        |             | 0.796245        | 0.607892        | 0.002856284                              | 0.043926        | 0.062708694                 | 0.1628663       |
| <b>DM-MQ/</b>  |        |             | 1.020874        | 0.803657        | 0.423838361                              | 1.499826        | 0.538297272                 | 1.6755972       |
| <b>P-value</b> |        |             | 0.864197        | 0.365429        | 0.004979463                              | 0.057086        | 0.074153561                 | 0.0036854       |
| <b>HF/NC</b>   |        |             | 0.95178         | 0.556422        | 0.824936544                              | 0.838422        | 0.674187703                 | 0.9779073       |
| <b>P-value</b> |        |             | 0.713359        | 0.019813        | 0.232824728                              | 0.311601        | 0.129324393                 | 0.8609684       |
| <b>HF-MQ/</b>  |        |             | 1.040942        | 0.999453        | 0.551201335                              | 1.465342        | 0.670875362                 | 1.0718632       |
| <b>P-value</b> |        |             | 0.75454         | 0.998522        | 0.006484964                              | 0.293136        | 0.118977071                 | 0.3381468       |
| <b>DM- MQ,</b> |        |             | 0.993865        | 0.713543        | 0.885694563                              | 1.01217         | 0.889211152                 | 1.2454965       |
| <b>P-value</b> |        |             | 0.855048        | 0.262419        | 0.485096198                              | 0.931533        | 0.264692403                 | 0.2782799       |
| <b>HF-MQ/</b>  |        |             | 1.093679        | 1.796215        | 0.668174223                              | 1.747737        | 0.995086916                 | 1.0960786       |
| <b>P-value</b> |        |             | 0.452854        | 0.131345        | 0.042075309                              | 0.153932        | 0.973584745                 | 0.433233        |

| SampleD        | class  | Weight      | Gamma.aminobutyric.acid..GABA.        | Glucose        | Glucose.6.phosphate        | Glutamate        | Glutamine        | Glycerate        | Glycerol        |
|----------------|--------|-------------|---------------------------------------|----------------|----------------------------|------------------|------------------|------------------|-----------------|
| NC             | Contra | 38.5        | 28.23449721                           | 30.1403        | 54.36399639                | 19.8374469       | 26.9616318       | 20.808435        | 25.04596        |
| NC             | Contra | 40          | 26.14082371                           | 20.8332        | 40.2444372                 | 17.0126263       | 30.4038682       | 19.507328        | 19.20149        |
| NC             | Contra | 34.4        | 44.18788309                           | 25.7816        | 50.52309514                | 25.6604244       | 30.9176218       | 19.080655        | 20.76896        |
| NC             | Contra | 39.3        | 23.01092464                           | 17.5452        | 22.80196543                | 13.0560681       | 25.6746541       | 16.500528        | 16.50395        |
|                |        | <b>Mean</b> | 30.39353216                           | 23.5751        | 41.98337354                | 18.8916414       | 28.489444        | 18.974237        | 20.38009        |
|                |        | <b>SE</b>   | 4.721704958                           | 2.76659        | 7.054295287                | 2.65040225       | 1.28511736       | 0.9027287        | 1.787343        |
|                |        | <b>CV</b>   | 31%                                   | 23%            | 34%                        | 28%              | 9%               | 10%              | 18%             |
| DM             | Diabet | 38.3        | 34.56255181                           | 27.5985        | 20.19945565                | 42.3907403       | 23.3370328       | 29.675456        | 23.45812        |
| DM             | Diabet | 38.1        | 26.4741247                            | 32.6763        | 16.60471449                | 26.1533193       | 19.9822086       | 36.571683        | 25.80609        |
| DM             | Diabet | 38.5        | 34.41373752                           | 31.5459        | 27.25322779                | 23.4636989       | 25.6109031       | 43.790913        | 23.66263        |
| DM             | Diabet | 38.3        | 27.33505599                           | 30.2862        | 23.14731801                | 28.07651         | 27.1776656       | 32.694782        | 23.53874        |
|                |        | <b>Mean</b> | 30.6963675                            | 30.5267        | 21.80117899                | 30.0210671       | 24.0269525       | 35.683208        | 24.11639        |
|                |        | <b>SE</b>   | 2.196435943                           | 1.09131        | 2.256577189                | 4.23033359       | 1.56183212       | 3.0488803        | 0.564799        |
|                |        | <b>CV</b>   | 14%                                   | 7%             | 21%                        | 28%              | 13%              | 17%              | 5%              |
| DM-MQ          | Diabet | 37.2        | 48.08056719                           | 31.1743        | 24.89842603                | 22.1864928       | 23.6331931       | 37.709614        | 25.66529        |
| DM-MQ          | Diabet | 36.4        | 28.44676196                           | 32.0546        | 17.18642555                | 39.7914689       | 31.0178439       | 34.848727        | 23.01581        |
| DM-MQ          | Diabet | 38.7        | 40.43296319                           | 29.0997        | 19.22957464                | 53.3230571       | 37.495826        | 27.863159        | 21.48915        |
|                |        | <b>Mean</b> | 38.98676411                           | 30.7762        | 20.43814207                | 38.4336729       | 30.715621        | 33.473833        | 23.39008        |
|                |        | <b>SE</b>   | 5.713731872                           | 0.87591        | 2.306817018                | 9.01395432       | 4.00464945       | 2.9243755        | 1.219985        |
|                |        | <b>CV</b>   | 25%                                   | 5%             | 20%                        | 41%              | 23%              | 15%              | 9%              |
| HF             | High F | 37.5        | 15.1951229                            | 21.4637        | 16.99517749                | 18.9398205       | 24.5837808       | 16.758241        | 18.31579        |
| HF             | High F | 34.8        | 20.65124038                           | 22.0451        | 35.56333766                | 17.0964191       | 23.8520391       | 17.881402        | 22.74881        |
| HF             | High F | 31.8        | 32.18603746                           | 17.8274        | 29.17899016                | 30.230725        | 23.6205956       | 16.448257        | 19.61512        |
| HF             | High F | 33.7        | 35.18747535                           | 21.2778        | 27.41216492                | 26.3369621       | 25.8482325       | 18.915992        | 20.27687        |
|                |        | <b>Mean</b> | 25.80496902                           | 20.6535        | 27.28741756                | 23.1509817       | 24.476162        | 17.500973        | 20.23915        |
|                |        | <b>SE</b>   | 4.724750549                           | 0.95611        | 3.851565353                | 3.0911816        | 0.50130518       | 0.5632396        | 0.930436        |
|                |        | <b>CV</b>   | 37%                                   | 9%             | 28%                        | 27%              | 4%               | 6%               | 9%              |
| HF-MQ          | High F | 37.1        | 27.30670727                           | 24.6888        | 32.54605693                | 25.3679089       | 32.6826441       | 20.711504        | 22.70858        |
| HF-MQ          | High F | 39.8        | 26.24621809                           | 19.7773        | 29.36634485                | 21.5360981       | 25.0175626       | 21.234711        | 20.83997        |
| HF-MQ          | High F | 39.8        | 24.18181722                           | 14.4043        | 17.73169644                | 24.1022684       | 24.7242903       | 18.108503        | 17.03005        |
| HF-MQ          | High F | 35.8        | 14.19041219                           | 20.5586        | 27.69304299                | 17.0328079       | 21.5849046       | 18.479583        | 20.02035        |
|                |        | <b>Mean</b> | 22.98128869                           | 19.8573        | 26.8342853                 | 22.0097708       | 26.0023504       | 19.633575        | 20.14974        |
|                |        | <b>SE</b>   | 3.001246801                           | 2.11299        | 3.196746385                | 1.84051992       | 2.3583786        | 0.7843846        | 1.182274        |
|                |        | <b>CV</b>   | 26%                                   | 21%            | 24%                        | 17%              | 18%              | 8%               | 12%             |
| <b>t-test</b>  |        |             |                                       |                |                            |                  |                  |                  |                 |
|                |        |             | <b>Gamma.aminobutyric.acid..GABA.</b> | <b>Glucose</b> | <b>Glucose.6.phosphate</b> | <b>Glutamate</b> | <b>Glutamine</b> | <b>Glycerate</b> | <b>Glycerol</b> |
| DM/NC          |        |             | 1.009963809                           | 1.29487        | 0.519281257                | 1.58911904       | 0.84336334       | 1.8806137        | 1.183331        |
| <b>P-value</b> |        |             | 0.955515236                           | 0.05805        | 0.034415624                | 0.06731783       | 0.06949345       | 0.0019108        | 0.093292        |
| DM-MQ/         |        |             | 1.282732257                           | 1.30545        | 0.486815145                | 2.0344274        | 1.07814042       | 1.7641729        | 1.147693        |
| <b>P-value</b> |        |             | 0.295212999                           | 0.0846         | 0.053505927                | 0.06218618       | 0.57156349       | 0.0028691        | 0.25613         |
| HF/NC          |        |             | 0.849028303                           | 0.87607        | 0.649957716                | 1.22546163       | 0.85913091       | 0.9223545        | 0.993084        |
| <b>P-value</b> |        |             | 0.517772281                           | 0.35677        | 0.117235259                | 0.33584016       | 0.0270025        | 0.2154638        | 0.946511        |
| HF-MQ/         |        |             | 0.756124315                           | 0.8423         | 0.63916458                 | 1.16505339       | 0.91270122       | 1.0347492        | 0.988697        |
| <b>P-value</b> |        |             | 0.233443909                           | 0.32661        | 0.098234597                | 0.3711993        | 0.39016318       | 0.6013182        | 0.917903        |
| DM- MQ,        |        |             | 1.270077448                           | 1.00817        | 0.937478752                | 1.28022341       | 1.27838189       | 0.9380836        | 0.969883        |
| <b>P-value</b> |        |             | 0.188104428                           | 0.87314        | 0.696222129                | 0.39533245       | 0.14087666       | 0.6338079        | 0.577544        |
| HF-MQ/         |        |             | 0.890576101                           | 0.96145        | 0.983394095                | 0.95070573       | 1.06235407       | 1.1218562        | 0.995582        |
| <b>P-value</b> |        |             | 0.63192165                            | 0.74307        | 0.930813246                | 0.76183063       | 0.55008733       | 0.0692918        | 0.954539        |

| SampleD       | class  | Weight         | Glycine        | Guanine        | Heptadecanoic.acid        | Histidine        | Hypotaurine        | Inotisol        | Isoleucine        | Lactate        | Lauric.acid        | Leucine        | Linoleate        |
|---------------|--------|----------------|----------------|----------------|---------------------------|------------------|--------------------|-----------------|-------------------|----------------|--------------------|----------------|------------------|
| NC            | Contrc | 38.5           | 38.7222        | 27.29546       | 29.65572209               | 26.0802          | 25.94151676        | 38.3439         | 28.015114         | 37.4869        | 21.7357803         | 28.0483        | 23.28746         |
| NC            | Contrc | 40             | 28.0385        | 25.85695       | 25.6828716                | 29.2894          | 21.21068056        | 33.1811         | 23.374523         | 29.9529        | 19.4758576         | 21.4138        | 22.197865        |
| NC            | Contrc | 34.4           | 36.4111        | 25.13165       | 36.86252076               | 30.86703         | 28.82642668        | 35.1211         | 24.792176         | 28.3742        | 27.5361388         | 25.3893        | 30.952352        |
| NC            | Contrc | 39.3           | 33.7347        | 24.22769       | 30.63428302               | 25.66787         | 24.89878655        | 29.5009         | 21.938269         | 29.576         | 18.5394679         | 22.4773        | 26.202253        |
|               |        | <b>Mean</b>    | 34.2266        | 25.62794       | 30.70884937               | 27.97613         | 25.21935264        | 34.0368         | 24.530021         | 31.3475        | 21.8218112         | 24.3322        | 25.659982        |
|               |        | <b>SE</b>      | 2.30067        | 0.648077       | 2.313776879               | 1.258459         | 1.573338239        | 1.84919         | 1.2995816         | 2.07396        | 2.0194516          | 1.49678        | 1.9561517        |
|               |        | <b>CV</b>      | 13%            | 5%             | 15%                       | 9%               | 12%                | 11%             | 11%               | 13%            | 19%                | 12%            | 15%              |
| DM            | Diabel | 38.3           | 19.2681        | 24.22362       | 17.75799024               | 22.86852         | 19.0328184         | 18.6307         | 34.157857         | 3.92911        | 22.678437          | 31.9613        | 21.04484         |
| DM            | Diabel | 38.1           | 10.313         | 19.702         | 23.08725482               | 18.89555         | 18.63557659        | 19.116          | 21.801243         | 7.34093        | 26.9055215         | 22.4353        | 28.670817        |
| DM            | Diabel | 38.5           | 17.6136        | 22.54548       | 23.03448359               | 23.91518         | 15.50939818        | 20.0374         | 21.289888         | 11.7898        | 25.4866871         | 21.4986        | 22.551904        |
| DM            | Diabel | 38.3           | 26.789         | 22.56114       | 23.27055859               | 20.52784         | 17.66162386        | 22.284          | 33.502438         | 13.9223        | 25.894034          | 32.327         | 26.184535        |
|               |        | <b>Mean</b>    | 18.4959        | 22.25806       | 21.78757181               | 21.55177         | 17.70985426        | 20.017          | 27.687857         | 9.24555        | 25.2411699         | 27.0555        | 24.613024        |
|               |        | <b>SE</b>      | 3.38021        | 0.938589       | 1.344146023               | 1.133706         | 0.788010633        | 0.81            | 3.5503108         | 2.2405         | 0.90481012         | 2.94507        | 1.7300164        |
|               |        | <b>CV</b>      | 37%            | 8%             | 12%                       | 11%              | 9%                 | 8%              | 26%               | 48%            | 7%                 | 22%            | 14%              |
| DM-MQ         | Diabel | 37.2           | 19.3746        | 25.22113       | 20.56460281               | 22.80385         | 22.6343892         | 20.271          | 30.966273         | 8.29821        | 23.3253067         | 30.002         | 25.422151        |
| DM-MQ         | Diabel | 36.4           | 27.2003        | 22.86736       | 23.93837788               | 25.46069         | 18.34521908        | 21.7421         | 34.149014         | 11.3446        | 27.332806          | 32.5587        | 27.019324        |
| DM-MQ         | Diabel | 38.7           | 30.1439        | 23.41103       | 21.76186617               | 32.20191         | 17.4992462         | 20.0982         | 34.963564         | 13.1972        | 21.780459          | 31.5679        | 22.644857        |
|               |        | <b>Mean</b>    | 25.5729        | 23.83317       | 22.08828229               | 26.82215         | 19.49295149        | 20.7038         | 33.359617         | 10.9466        | 24.1461906         | 31.3762        | 25.028777        |
|               |        | <b>SE</b>      | 3.21354        | 0.711506       | 0.987505301               | 2.797086         | 1.589590164        | 0.52154         | 1.2195552         | 1.42814        | 1.65454193         | 0.74427        | 1.2780257        |
|               |        | <b>CV</b>      | 22%            | 5%             | 8%                        | 18%              | 14%                | 4%              | 6%                | 23%            | 12%                | 4%             | 9%               |
| HF            | High F | 37.5           | 24.7386        | 26.76007       | 25.46165253               | 22.13591         | 23.193295          | 24.4775         | 17.85295          | 30.693         | 22.261515          | 18.8254        | 23.998292        |
| HF            | High F | 34.8           | 18.0647        | 78.76161       | 28.93102432               | 25.72004         | 31.01174507        | 29.8037         | 19.227814         | 31.341         | 27.8396696         | 20.0979        | 25.143543        |
| HF            | High F | 31.8           | 24.9153        | 28.82522       | 31.09426974               | 26.67228         | 32.89417993        | 24.9086         | 23.676914         | 30.17          | 28.2788718         | 23.2204        | 27.301027        |
| HF            | High F | 33.7           | 25.3179        | 22.44807       | 26.63442798               | 24.59112         | 23.82287483        | 41.9277         | 21.632838         | 29.9052        | 25.1607423         | 21.0767        | 26.573026        |
|               |        | <b>Mean</b>    | 23.2591        | 39.19875       | 28.03034364               | 24.77983         | 27.73052371        | 30.2794         | 20.597629         | 30.5273        | 25.8851997         | 20.8051        | 25.753972        |
|               |        | <b>SE</b>      | 1.73572        | 13.25436       | 1.249854104               | 0.978575         | 2.471266936        | 4.0663          | 1.2898097         | 0.31679        | 1.39060981         | 0.92768        | 0.73707          |
|               |        | <b>CV</b>      | 15%            | 68%            | 9%                        | 8%               | 18%                | 27%             | 13%               | 2%             | 11%                | 9%             | 6%               |
| HF-MQ         | High F | 37.1           | 44.2967        | 30.07506       | 24.94856296               | 30.04889         | 29.69608482        | 29.9524         | 30.399396         | 32.235         | 24.8806348         | 30.4627        | 19.824436        |
| HF-MQ         | High F | 39.8           | 35.3023        | 26.12458       | 28.47106998               | 29.76951         | 32.81537644        | 24.0874         | 19.729993         | 27.387         | 29.1883439         | 18.8673        | 24.988595        |
| HF-MQ         | High F | 39.8           | 31.1165        | 23.76407       | 26.5935873                | 36.13795         | 45.49852238        | 20.7779         | 25.059404         | 25.686         | 24.3745415         | 25.4698        | 22.576589        |
| HF-MQ         | High F | 35.8           | 28.6492        | 23.76324       | 25.11096034               | 27.85904         | 27.67136781        | 23.3826         | 21.918911         | 30.7715        | 21.839106          | 22.7626        | 25.640639        |
|               |        | <b>Mean</b>    | 34.8412        | 25.93174       | 26.28104515               | 30.95385         | 33.92033786        | 24.5501         | 24.276926         | 29.0199        | 25.0706566         | 24.3906        | 23.257565        |
|               |        | <b>SE</b>      | 3.43794        | 1.489          | 0.818458846               | 1.795234         | 4.001762496        | 1.93629         | 2.3153788         | 1.50517        | 1.52531286         | 2.43572        | 1.3205304        |
|               |        | <b>CV</b>      | 20%            | 11%            | 6%                        | 12%              | 24%                | 16%             | 19%               | 10%            | 12%                | 20%            | 11%              |
| <b>t-test</b> |        |                |                |                |                           |                  |                    |                 |                   |                |                    |                |                  |
|               |        |                | <b>Glycine</b> | <b>Guanine</b> | <b>Heptadecanoic.acid</b> | <b>Histidine</b> | <b>Hypotaurine</b> | <b>Inotisol</b> | <b>Isoleucine</b> | <b>Lactate</b> | <b>Lauric.acid</b> | <b>Leucine</b> | <b>Linoleate</b> |
| DM/NC         |        |                | 0.5404         | 0.868508       | 0.709488381               | 0.770363         | 0.702232706        | 0.5881          | 1.1287335         | 0.29494        | 1.15669454         | 1.11192        | 0.9591988        |
|               |        | <b>P-value</b> | 0.00849        | 0.025464       | 0.015728974               | 0.009043         | 0.005276859        | 0.00044         | 0.4355656         | 0.00035        | 0.17325149         | 0.44127        | 0.7023688        |
| DM-MQ/        |        |                | 0.74716        | 0.929969       | 0.719280688               | 0.958751         | 0.772936236        | 0.60828         | 1.3599506         | 0.3492         | 1.10651634         | 1.28949        | 0.9754012        |
|               |        | <b>P-value</b> | 0.07319        | 0.123736       | 0.029600647               | 0.694641         | 0.054293882        | 0.00188         | 0.0049505         | 0.00068        | 0.43833834         | 0.01326        | 0.8143125        |
| HF/NC         |        |                | 0.67956        | 1.529532       | 0.912777399               | 0.885749         | 1.099573177        | 0.88961         | 0.8396907         | 0.97384        | 1.18620767         | 0.85504        | 1.0036629        |
|               |        | <b>P-value</b> | 0.00891        | 0.345922       | 0.347723769               | 0.091787         | 0.424258337        | 0.43251         | 0.0753465         | 0.70935        | 0.14855142         | 0.09205        | 0.9655964        |
| HF-MQ/        |        |                | 1.01796        | 1.011854       | 0.855813412               | 1.106438         | 1.345012235        | 0.72128         | 0.9896822         | 0.92575        | 1.14888065         | 1.0024         | 0.9063749        |
|               |        | <b>P-value</b> | 0.88676        | 0.857765       | 0.121258021               | 0.223246         | 0.089464073        | 0.01217         | 0.9271631         | 0.39873        | 0.24657719         | 0.98436        | 0.3479976        |
| DM- MQ,       |        |                | 1.38262        | 1.070766       | 1.013801927               | 1.244545         | 1.100683902        | 1.03431         | 1.2048465         | 1.18399        | 0.95661931         | 1.1597         | 1.0168916        |
|               |        | <b>P-value</b> | 0.20191        | 0.266599       | 0.8733326297              | 0.108133         | 0.32231769         | 0.54309         | 0.246518          | 0.58395        | 0.55895235         | 0.27666        | 0.8642025        |
| HF-MQ/        |        |                | 1.49796        | 0.661545       | 0.937592685               | 1.249155         | 1.223213028        | 0.81079         | 1.1786272         | 0.95062        | 0.96853248         | 1.17234        | 0.9030671        |
|               |        | <b>P-value</b> | 0.02378        | 0.35829        | 0.286036143               | 0.023408         | 0.236199165        | 0.25041         | 0.2144222         | 0.36493        | 0.70676158         | 0.21807        | 0.1498855        |

| SampleD       | class  | Weight      | Linolenic.acid | Lysine | Malate  | Mannose  | Methionine  | Myristic.acid | N.Acetylaspartate | N.acetylglutamate | Oleic.acid |
|---------------|--------|-------------|----------------|--------|---------|----------|-------------|---------------|-------------------|-------------------|------------|
| NC            | Contrc | 38.5        | 23.12896995    | 28.704 | 20.2988 | 28.12502 | 26.82408553 | 30.68139828   | 29.0554831        | 29.97047537       | 21.062415  |
| NC            | Contrc | 40          | 21.87992656    | 30.818 | 21.8806 | 26.70452 | 22.20415587 | 28.09845955   | 18.47245188       | 28.48223489       | 21.374464  |
| NC            | Contrc | 34.4        | 22.29127741    | 29.246 | 24.6291 | 22.75879 | 24.26861987 | 33.46840652   | 32.31688318       | 32.16894307       | 27.437448  |
| NC            | Contrc | 39.3        | 21.91608273    | 23.891 | 16.8474 | 16.63192 | 26.71489542 | 31.76060915   | 17.78397848       | 28.37434265       | 25.656793  |
|               |        | <b>Mean</b> | 22.30406416    | 28.164 | 20.914  | 23.55506 | 25.00293917 | 31.00221838   | 24.40719916       | 29.748999         | 23.88278   |
|               |        | <b>SE</b>   | 0.290266452    | 1.4935 | 1.62409 | 2.571763 | 1.103773114 | 1.125165966   | 3.688472158       | 0.885040134       | 1.5819     |
|               |        | <b>CV</b>   | 3%             | 11%    | 16%     | 22%      | 9%          | 7%            | 30%               | 6%                | 13%        |
| DM            | Diabel | 38.3        | 29.17849827    | 22.304 | 18.9662 | 28.77987 | 29.43708621 | 19.95276489   | 17.09283276       | 25.42323936       | 23.097425  |
| DM            | Diabel | 38.1        | 32.67793821    | 15.991 | 25.2582 | 35.72647 | 23.08015084 | 28.55549697   | 22.41133577       | 23.27065309       | 30.578674  |
| DM            | Diabel | 38.5        | 22.11319979    | 23.141 | 37.2397 | 42.20834 | 25.28773594 | 26.66897281   | 15.24500852       | 19.8415366        | 27.017416  |
| DM            | Diabel | 38.3        | 29.14983118    | 19.921 | 31.7646 | 28.54192 | 24.70350799 | 26.36707933   | 31.08261063       | 22.00289926       | 26.514373  |
|               |        | <b>Mean</b> | 28.27986686    | 20.339 | 28.3072 | 33.81415 | 25.62712025 | 25.3860785    | 21.45794692       | 22.63458208       | 26.801972  |
|               |        | <b>SE</b>   | 2.216137607    | 1.6018 | 3.9612  | 3.256529 | 1.353117852 | 1.874706435   | 3.549623538       | 1.168379291       | 1.5306936  |
|               |        | <b>CV</b>   | 16%            | 16%    | 28%     | 19%      | 11%         | 15%           | 33%               | 10%               | 11%        |
| DM-MQ         | Diabel | 37.2        | 23.21146276    | 19.804 | 28.8386 | 26.93253 | 26.19596158 | 15.93484664   | 24.74775357       | 22.45447963       | 26.785277  |
| DM-MQ         | Diabel | 36.4        | 24.6286002     | 25.759 | 42.7783 | 29.29344 | 30.11130453 | 22.89099384   | 17.48292304       | 27.75388154       | 27.800892  |
| DM-MQ         | Diabel | 38.7        | 24.05279558    | 27.631 | 36.8989 | 31.44629 | 28.57613233 | 20.79261233   | 13.88478501       | 25.37948503       | 23.017439  |
|               |        | <b>Mean</b> | 23.96428618    | 24.398 | 36.1719 | 29.22409 | 28.29446615 | 19.8728176    | 18.70515387       | 25.19594874       | 25.867869  |
|               |        | <b>SE</b>   | 0.411479069    | 2.3598 | 4.04044 | 1.303472 | 1.139002412 | 2.060057664   | 3.194860855       | 1.532555528       | 1.4550582  |
|               |        | <b>CV</b>   | 3%             | 17%    | 19%     | 8%       | 7%          | 18%           | 30%               | 11%               | 10%        |
| HF            | High F | 37.5        | 27.50300946    | 26.023 | 17.2984 | 20.05071 | 24.23498409 | 26.83399369   | 21.33883942       | 27.85165708       | 21.689292  |
| HF            | High F | 34.8        | 24.57084905    | 31.43  | 20.2473 | 23.12977 | 19.16578793 | 30.2474019    | 29.09046357       | 38.95820375       | 21.683807  |
| HF            | High F | 31.8        | 28.02063352    | 22.556 | 26.5144 | 18.06477 | 23.80547866 | 34.84424188   | 20.41803741       | 23.63302547       | 25.519468  |
| HF            | High F | 33.7        | 24.10992347    | 26.993 | 20.5826 | 19.88566 | 24.78575858 | 33.72275593   | 69.68657582       | 25.7101817        | 25.664715  |
|               |        | <b>Mean</b> | 26.05110387    | 26.751 | 21.1607 | 20.28272 | 22.99800231 | 31.41209835   | 35.13347905       | 29.038267         | 23.63932   |
|               |        | <b>SE</b>   | 0.997764693    | 1.8275 | 1.93105 | 1.050256 | 1.293061016 | 1.812785787   | 11.68072072       | 3.416942786       | 1.1278232  |
|               |        | <b>CV</b>   | 8%             | 14%    | 18%     | 10%      | 11%         | 12%           | 66%               | 24%               | 10%        |
| HF-MQ         | High F | 37.1        | 19.21138307    | 28.203 | 21.9282 | 24.20897 | 24.59296741 | 27.42793876   | 25.25923804       | 23.07209233       | 20.063716  |
| HF-MQ         | High F | 39.8        | 27.252138      | 27.913 | 25.6129 | 21.10299 | 20.32052735 | 34.83074095   | 20.08328732       | 23.23346628       | 22.852121  |
| HF-MQ         | High F | 39.8        | 27.9927916     | 30.334 | 20.9765 | 18.28998 | 22.25368486 | 32.05938747   | 14.31879057       | 22.0640652        | 24.837806  |
| HF-MQ         | High F | 35.8        | 27.99577277    | 23.171 | 22.3068 | 20.28685 | 20.68788532 | 30.19224      | 21.08410371       | 22.67688372       | 22.35143   |
|               |        | <b>Mean</b> | 25.61302136    | 27.405 | 22.7061 | 20.9722  | 21.96376623 | 31.1275768    | 20.18635491       | 22.76162688       | 22.526268  |
|               |        | <b>SE</b>   | 2.141037266    | 1.5112 | 1.00853 | 1.230101 | 0.971461862 | 1.55841459    | 2.254237313       | 0.260255469       | 0.9808211  |
|               |        | <b>CV</b>   | 17%            | 11%    | 9%      | 12%      | 9%          | 10%           | 22%               | 2%                | 9%         |
| <b>t-test</b> |        |             |                |        |         |          |             |               |                   |                   |            |
|               |        |             | Linolenic.acid | Lysine | Malate  | Mannose  | Methionine  | Myristic.acid | N.Acetylaspartate | N.acetylglutamate | Oleic.acid |
| DM/NC         |        |             | 1.267924386    | 0.7222 | 1.35351 | 1.435536 | 1.024964308 | 0.818847161   | 0.879164659       | 0.760851889       | 1.12223    |
| P-value       |        |             | 0.036846364    | 0.0117 | 0.13493 | 0.048305 | 0.732992426 | 0.042413564   | 0.585471799       | 0.002840693       | 0.2330325  |
| DM-MQ/        |        |             | 1.074435852    | 0.8663 | 1.72956 | 1.240671 | 1.131645602 | 0.641012761   | 0.766378549       | 0.846951144       | 1.083118   |
| P-value       |        |             | 0.018959659    | 0.2144 | 0.01114 | 0.139841 | 0.097371894 | 0.003737732   | 0.315880837       | 0.040298954       | 0.4146932  |
| HF/NC         |        |             | 1.167998069    | 0.9498 | 1.0118  | 0.861077 | 0.919811953 | 1.013220989   | 1.43947197        | 0.976109045       | 0.9898061  |
| P-value       |        |             | 0.011285727    | 0.571  | 0.9253  | 0.283409 | 0.282914553 | 0.853994169   | 0.414886519       | 0.847071901       | 0.9043675  |
| HF-MQ/        |        |             | 1.148356693    | 0.973  | 1.08569 | 0.890348 | 0.878447373 | 1.004043531   | 0.827065604       | 0.765122446       | 0.9432013  |
| P-value       |        |             | 0.176531935    | 0.7331 | 0.38473 | 0.39985  | 0.084246547 | 0.950119217   | 0.366565729       | 0.000275242       | 0.493577   |
| DM- MQ,       |        |             | 0.847397419    | 1.1996 | 1.27784 | 0.864256 | 1.104082935 | 0.782823452   | 0.871712189       | 1.11316165        | 0.965148   |
| P-value       |        |             | 0.163649833    | 0.1982 | 0.23166 | 0.303582 | 0.211673946 | 0.106925291   | 0.604112391       | 0.232403383       | 0.6864306  |
| HF-MQ/†       |        |             | 0.983183725    | 1.0245 | 1.07303 | 1.033993 | 0.955029308 | 0.990942294   | 0.574561798       | 0.783849356       | 0.9529152  |
| P-value       |        |             | 0.858977281    | 0.7918 | 0.50471 | 0.684781 | 0.546140118 | 0.909145924   | 0.255653492       | 0.116727146       | 0.4845955  |

| SampleD       | class          | Weight      | O.Phosphoethanolamine        | Ornithine        | Palmitate        | Phenylalanine        | Phosphoenolpyruvate        | Proline        | Prostaglandin.E2        | Pterin        |
|---------------|----------------|-------------|------------------------------|------------------|------------------|----------------------|----------------------------|----------------|-------------------------|---------------|
| NC            | Contrc         | 38.5        | 24.08211962                  | 26.103233        | 25.975275        | 34.14939431          | 24.68008102                | 25.0482        | 28.54612278             | 27.084        |
| NC            | Contrc         | 40          | 16.57495234                  | 31.60314         | 23.811049        | 27.56997421          | 21.29933268                | 26.4921        | 31.0185495              | 16.88         |
| NC            | Contrc         | 34.4        | 25.81942458                  | 22.577801        | 30.515504        | 29.48334388          | 24.36463504                | 18.8978        | 20.01048733             | 22.257        |
| NC            | Contrc         | 39.3        | 17.98661593                  | 17.759715        | 26.609325        | 25.13507552          | 18.22507652                | 18.1834        | 16.58784116             | 19.675        |
|               |                | <b>Mean</b> | 21.11577812                  | 24.510972        | 26.727788        | 29.08444698          | 22.14228131                | 22.1554        | 24.04075019             | 21.474        |
|               |                | <b>SE</b>   | 2.260793126                  | 2.9176298        | 1.3974521        | 1.908401879          | 1.512016844                | 2.11273        | 3.425114805             | 2.1684        |
|               |                | <b>CV</b>   | 21%                          | 24%              | 10%              | 13%                  | 14%                        | 19%            | 28%                     | 20%           |
| DM            | Diabel         | 38.3        | 29.73276283                  | 29.598664        | 20.258498        | 27.06903202          | 28.0236724                 | 22.1513        | 37.5441278              | 25.806        |
| DM            | Diabel         | 38.1        | 22.67672895                  | 18.667619        | 23.895641        | 18.658407            | 26.83075435                | 16.6772        | 31.53940249             | 48.844        |
| DM            | Diabel         | 38.5        | 27.36031183                  | 26.668266        | 23.995249        | 18.44426337          | 27.62516076                | 18.689         | 27.76314438             | 39.976        |
| DM            | Diabel         | 38.3        | 25.5735501                   | 20.438106        | 23.440656        | 25.85520376          | 24.33073411                | 21.819         | 25.86926919             | 29.148        |
|               |                | <b>Mean</b> | 26.33583843                  | 23.843164        | 22.897511        | 22.50672654          | 26.70258041                | 19.8341        | 30.67898596             | 35.944        |
|               |                | <b>SE</b>   | 1.487694155                  | 2.5737081        | 0.8879137        | 2.297464205          | 0.828579205                | 1.30978        | 2.574004608             | 5.257         |
|               |                | <b>CV</b>   | 11%                          | 22%              | 8%               | 20%                  | 6%                         | 13%            | 17%                     | 29%           |
| DM-MQ         | Diabel         | 37.2        | 31.39004261                  | 29.820942        | 23.771674        | 22.98827027          | 30.38627218                | 19.4503        | 28.33042253             | 34.757        |
| DM-MQ         | Diabel         | 36.4        | 32.54400071                  | 23.477003        | 25.496659        | 34.35057271          | 27.02327123                | 22.4197        | 28.85448589             | 21.585        |
| DM-MQ         | Diabel         | 38.7        | 28.68704355                  | 30.172314        | 23.82401         | 31.36636073          | 23.41855332                | 25.3072        | 26.81219005             | 15.794        |
|               |                | <b>Mean</b> | 30.87369562                  | 27.82342         | 24.364114        | 29.56840123          | 26.94269891                | 22.3924        | 27.99903282             | 24.045        |
|               |                | <b>SE</b>   | 1.142947986                  | 2.1755743        | 0.5664739        | 3.400978925          | 2.01181058                 | 1.69079        | 0.612401675             | 5.6106        |
|               |                | <b>CV</b>   | 6%                           | 14%              | 4%               | 20%                  | 13%                        | 13%            | 4%                      | 40%           |
| HF            | High F         | 37.5        | 27.83240054                  | 16.001821        | 23.960737        | 21.69147225          | 19.89452984                | 22.4298        | 20.39372428             | 29.79         |
| HF            | High F         | 34.8        | 29.75896082                  | 15.157078        | 26.529698        | 23.57157279          | 27.76355988                | 31.7179        | 24.5451319              | 33.612        |
| HF            | High F         | 31.8        | 24.58627207                  | 21.67291         | 27.648033        | 26.32810658          | 21.9834104                 | 27.9195        | 21.10114025             | 10.712        |
| HF            | High F         | 33.7        | 44.6545675                   | 17.611994        | 24.966161        | 27.3427935           | 20.74507778                | 23.3661        | 19.98216127             | 18.515        |
|               |                | <b>Mean</b> | 31.70805024                  | 17.610951        | 25.776157        | 24.73348628          | 22.59664447                | 26.3583        | 21.50553942             | 23.157        |
|               |                | <b>SE</b>   | 4.445518752                  | 1.4465563        | 0.8176992        | 1.289547414          | 1.774889516                | 2.15152        | 1.039209436             | 5.242         |
|               |                | <b>CV</b>   | 28%                          | 16%              | 6%               | 10%                  | 16%                        | 16%            | 10%                     | 45%           |
| HF-MQ         | High F         | 37.1        | 32.17099782                  | 25.626812        | 24.253852        | 34.71198684          | 24.84058745                | 23.8956        | 23.75522643             | 32.545        |
| HF-MQ         | High F         | 39.8        | 21.67109581                  | 24.04882         | 25.779409        | 21.9036797           | 23.92139996                | 19.1278        | 20.95070205             | 22.681        |
| HF-MQ         | High F         | 39.8        | 21.11308411                  | 31.894253        | 24.303777        | 29.62127922          | 20.75721021                | 25.5485        | 22.98391103             | 12.051        |
| HF-MQ         | High F         | 35.8        | 28.3232721                   | 17.991974        | 22.99292         | 25.39086536          | 21.86944018                | 24.3055        | 20.73132983             | 30.06         |
|               |                | <b>Mean</b> | 25.81961246                  | 24.890464        | 24.332489        | 27.90695278          | 22.84715945                | 23.2194        | 22.10529234             | 24.334        |
|               |                | <b>SE</b>   | 2.676596207                  | 2.8561745        | 0.5697244        | 2.763110976          | 0.933254639                | 1.4084         | 0.748058878             | 4.599         |
|               |                | <b>CV</b>   | 21%                          | 23%              | 5%               | 20%                  | 8%                         | 12%            | 7%                      | 38%           |
| <b>t-test</b> |                |             |                              |                  |                  |                      |                            |                |                         |               |
|               |                |             | <b>O.Phosphoethanolamine</b> | <b>Ornithine</b> | <b>Palmitate</b> | <b>Phenylalanine</b> | <b>Phosphoenolpyruvate</b> | <b>Proline</b> | <b>Prostaglandin.E2</b> | <b>Pterin</b> |
|               | <b>DM/NC</b>   |             | 1.247211364                  | 0.9727547        | 0.8566931        | 0.773840622          | 1.205954347                | 0.89523        | 1.276124319             | 1.6738        |
|               | <b>P-value</b> |             | 0.102012717                  | 0.8693571        | 0.059987         | 0.06987641           | 0.038286952                | 0.38644        | 0.172268562             | 0.0438        |
|               | <b>DM-MQ/</b>  |             | 1.462114986                  | 1.1351414        | 0.9115649        | 1.016639624          | 1.216798691                | 1.0107         | 1.164648881             | 1.1197        |
|               | <b>P-value</b> |             | 0.018536551                  | 0.434754         | 0.2277882        | 0.899209856          | 0.10807923                 | 0.93744        | 0.377049037             | 0.6511        |
|               | <b>HF/NC</b>   |             | 1.501628311                  | 0.7184925        | 0.9643955        | 0.850402495          | 1.02052016                 | 1.1897         | 0.894545272             | 1.0784        |
|               | <b>P-value</b> |             | 0.077871262                  | 0.0784116        | 0.5781337        | 0.107792779          | 0.851925381                | 0.21281        | 0.505332396             | 0.7767        |
|               | <b>HF-MQ/</b>  |             | 1.22276396                   | 1.0154825        | 0.9103817        | 0.959514644          | 1.031834034                | 1.04802        | 0.919492618             | 1.1332        |
|               | <b>P-value</b> |             | 0.227976113                  | 0.9289723        | 0.1635624        | 0.737838165          | 0.705311412                | 0.68978        | 0.600846714             | 0.5941        |
|               | <b>DM- MQ,</b> |             | 1.172307299                  | 1.1669349        | 1.0640508        | 1.313758409          | 1.008992333                | 1.12898        | 0.912645315             | 0.669         |
|               | <b>P-value</b> |             | 0.07286979                   | 0.3128729        | 0.2591624        | 0.13270105           | 0.906694989                | 0.27714        | 0.425211958             | 0.1873        |
|               | <b>HF-MQ/</b>  |             | 0.814292026                  | 1.4133516        | 0.9439921        | 1.128306477          | 1.011086379                | 0.88091        | 1.027888299             | 1.0508        |
|               | <b>P-value</b> |             | 0.299762457                  | 0.0633443        | 0.1976201        | 0.338101226          | 0.90466193                 | 0.268          | 0.656036041             | 0.8715        |

| SampleD       | class          | Weight      | Pyruvate        | Ribose        | Ribose.5.phosphate        | Serine        | Sphingosine        | Stearate        | Succinate        | Threonine        |
|---------------|----------------|-------------|-----------------|---------------|---------------------------|---------------|--------------------|-----------------|------------------|------------------|
| NC            | Contra         | 38.5        | 31.04066        | 31.985        | 30.4385041                | 35.108        | 26.08265498        | 20.14442        | 26.092308        | 34.357019        |
| NC            | Contra         | 40          | 35.9622         | 27.93         | 26.27542557               | 31.409        | 26.87424309        | 19.02224        | 17.55856         | 24.967812        |
| NC            | Contra         | 34.4        | 31.99871        | 29.02         | 30.16363208               | 30.345        | 19.64081454        | 27.44166        | 25.466371        | 23.157509        |
| NC            | Contra         | 39.3        | 36.06818        | 23.762        | 21.9484185                | 25.917        | 23.91896219        | 23.10395        | 21.176198        | 23.746326        |
|               |                | <b>Mean</b> | 33.76744        | 28.174        | 27.20649506               | 30.695        | 24.1291687         | 22.42807        | 22.573359        | 26.557166        |
|               |                | <b>SE</b>   | 1.312572        | 1.7021        | 1.993840543               | 1.8914        | 1.621240571        | 1.879885        | 1.9969309        | 2.6271378        |
|               |                | <b>CV</b>   | 8%              | 12%           | 15%                       | 12%           | 13%                | 17%             | 18%              | 20%              |
| DM            | Diabet         | 38.3        | 10.96628        | 28.313        | 23.84674138               | 17.492        | 23.40643844        | 19.84858        | 24.593651        | 22.55582         |
| DM            | Diabet         | 38.1        | 12.36346        | 32.396        | 26.48191494               | 12.016        | 29.81435848        | 22.82454        | 28.065404        | 15.038191        |
| DM            | Diabet         | 38.5        | 15.66481        | 25.86         | 22.64098192               | 15.623        | 20.96998576        | 22.11494        | 33.511597        | 8.3586597        |
| DM            | Diabet         | 38.3        | 16.19793        | 29.198        | 23.33029369               | 22.935        | 21.56007634        | 23.42302        | 31.715107        | 21.179967        |
|               |                | <b>Mean</b> | 13.79812        | 28.942        | 24.07498298               | 17.016        | 23.93771476        | 22.05277        | 29.47144         | 16.783159        |
|               |                | <b>SE</b>   | 1.268897        | 1.3507        | 0.83946098                | 2.2767        | 2.026445489        | 0.781852        | 1.9817223        | 3.249008         |
|               |                | <b>CV</b>   | 18%             | 9%            | 7%                        | 27%           | 17%                | 7%              | 13%              | 39%              |
| DM-MQ         | Diabet         | 37.2        | 10.98127        | 28.878        | 33.02618681               | 18.29         | 22.65704038        | 22.56156        | 30.779163        | 19.132061        |
| DM-MQ         | Diabet         | 36.4        | 14.36668        | 29.523        | 29.65020817               | 22.524        | 26.26839489        | 27.02167        | 28.806284        | 18.042452        |
| DM-MQ         | Diabet         | 38.7        | 16.59718        | 22.469        | 26.4235547                | 27.21         | 21.42409993        | 24.58033        | 30.718721        | 20.208856        |
|               |                | <b>Mean</b> | 13.98171        | 26.956        | 29.69998322               | 22.675        | 23.44984506        | 24.72119        | 30.10139         | 19.127789        |
|               |                | <b>SE</b>   | 1.632558        | 2.2515        | 1.906178188               | 2.5762        | 1.453524781        | 1.289447        | 0.6477878        | 0.6253906        |
|               |                | <b>CV</b>   | 20%             | 14%           | 11%                       | 20%           | 11%                | 9%              | 4%               | 6%               |
| HF            | High F         | 37.5        | 29.18089        | 19.234        | 19.58675165               | 22.081        | 22.89772805        | 25.66901        | 20.517623        | 25.44499         |
| HF            | High F         | 34.8        | 29.13605        | 21.023        | 29.93522476               | 21.027        | 23.1337564         | 26.75361        | 22.29322         | 27.868936        |
| HF            | High F         | 31.8        | 40.81846        | 24.782        | 26.76234926               | 28.756        | 23.03142889        | 29.22295        | 21.406111        | 37.168518        |
| HF            | High F         | 33.7        | 34.50395        | 20.428        | 23.03688008               | 30.495        | 19.56909401        | 25.03418        | 18.436596        | 36.375145        |
|               |                | <b>Mean</b> | 33.40984        | 21.367        | 24.83030144               | 25.59         | 22.15800184        | 26.66994        | 20.663387        | 31.714397        |
|               |                | <b>SE</b>   | 2.772395        | 1.1976        | 2.245444008               | 2.3667        | 0.864321042        | 0.922065        | 0.8260267        | 2.9659604        |
|               |                | <b>CV</b>   | 17%             | 11%           | 18%                       | 18%           | 8%                 | 7%              | 8%               | 19%              |
| HF-MQ         | High F         | 37.1        | 29.09082        | 25.303        | 27.97363973               | 38.256        | 26.79238786        | 27.33706        | 27.285141        | 37.443161        |
| HF-MQ         | High F         | 39.8        | 26.48241        | 30.438        | 22.49585378               | 27.229        | 30.02159328        | 27.94726        | 20.303541        | 28.437315        |
| HF-MQ         | High F         | 39.8        | 31.86033        | 16.303        | 22.20782515               | 36.18         | 34.4375234         | 26.26372        | 21.184087        | 39.681513        |
| HF-MQ         | High F         | 35.8        | 34.10237        | 26.128        | 25.86327554               | 27.479        | 19.02328651        | 24.66603        | 20.993782        | 29.287962        |
|               |                | <b>Mean</b> | 30.38398        | 24.543        | 24.63514855               | 32.286        | 27.56869776        | 26.55352        | 22.441637        | 33.712488        |
|               |                | <b>SE</b>   | 1.655811        | 2.9684        | 1.388113237               | 2.8794        | 3.250950792        | 0.718972        | 1.6255436        | 2.842403         |
|               |                | <b>CV</b>   | 11%             | 24%           | 11%                       | 18%           | 24%                | 5%              | 14%              | 17%              |
| <b>t-test</b> |                |             |                 |               |                           |               |                    |                 |                  |                  |
|               |                |             | <b>Pyruvate</b> | <b>Ribose</b> | <b>Ribose.5.phosphate</b> | <b>Serine</b> | <b>Sphingosine</b> | <b>Stearate</b> | <b>Succinate</b> | <b>Threonine</b> |
|               | <b>DM/NC</b>   |             | 0.408622        | 1.0272        | 0.884898364               | 0.5544        | 0.992065456        | 0.983266        | 1.305585         | 0.6319635        |
|               | <b>P-value</b> |             | 3.47E-05        | 0.7361        | 0.197904667               | 0.0036        | 0.94358884         | 0.859824        | 0.049662         | 0.0579033        |
|               | <b>DM-MQ/</b>  |             | 0.414059        | 0.9568        | 1.091650474               | 0.7387        | 0.971846372        | 1.102243        | 1.3334918        | 0.7202496        |
|               | <b>P-value</b> |             | 0.000211        | 0.6772        | 0.421294778               | 0.0494        | 0.776901771        | 0.396193        | 0.026689         | 0.0650019        |
|               | <b>HF/NC</b>   |             | 0.98941         | 0.7584        | 0.912660796               | 0.8337        | 0.918307718        | 1.189132        | 0.9153882        | 1.1941936        |
|               | <b>P-value</b> |             | 0.910997        | 0.017         | 0.45889869                | 0.143         | 0.324563417        | 0.089171        | 0.4108034        | 0.2407859        |
|               | <b>HF-MQ/</b>  |             | 0.899801        | 0.8711        | 0.90548777                | 1.0518        | 1.142546521        | 1.183941        | 0.9941647        | 1.2694309        |
|               | <b>P-value</b> |             | 0.160431        | 0.3294        | 0.330609382               | 0.6605        | 0.380293006        | 0.086275        | 0.9608617        | 0.1140016        |
|               | <b>DM- MQ,</b> |             | 1.013305        | 0.9314        | 1.233645035               | 1.3325        | 0.979619203        | 1.121001        | 1.0213749        | 1.1397013        |
|               | <b>P-value</b> |             | 0.931441        | 0.4581        | 0.030312044               | 0.1619        | 0.863128871        | 0.119238        | 0.8039503        | 0.5719962        |
|               | <b>HF-MQ/</b>  |             | 0.909432        | 1.1487        | 0.992140535               | 1.2617        | 1.244186997        | 0.995635        | 1.086058         | 1.0630026        |
|               | <b>P-value</b> |             | 0.384913        | 0.3593        | 0.943472724               | 0.1225        | 0.15885798         | 0.923393        | 0.3671004        | 0.64395          |

| SampleD | class | Weight | Thymidine  | Tryptophan | Tyrosine | Uracil | Urea | Valine |
|---------|-------|--------|------------|------------|----------|--------|------|--------|
| NC      | Contr | 38.5   | 25.8993193 | 32.1467588 | 28.1712  | 26.66  | 31.6 | 24.039 |
| NC      | Contr | 40     | 27.1815049 | 26.4095437 | 22.8671  | 20.36  | 36.3 | 19.968 |
| NC      | Contr | 34.4   | 33.1745464 | 28.087871  | 23.66903 | 25.42  | 27.7 | 22.739 |
| NC      | Contr | 39.3   | 29.2389713 | 26.0765287 | 21.00217 | 21.18  | 23.6 | 21.113 |

|             |            |            |          |       |      |        |
|-------------|------------|------------|----------|-------|------|--------|
| <b>Mean</b> | 28.8735855 | 28.1801755 | 23.92738 | 23.41 | 29.8 | 21.965 |
| <b>SE</b>   | 1.59010397 | 1.39351982 | 1.520906 | 1.552 | 2.72 | 0.8951 |
| <b>CV</b>   | 11%        | 10%        | 13%      | 13%   | 18%  | 8%     |

|    |        |      |            |            |          |       |      |        |
|----|--------|------|------------|------------|----------|-------|------|--------|
| DM | Diabel | 38.3 | 22.5019083 | 23.4765463 | 24.27639 | 22.71 | 23.7 | 37.087 |
| DM | Diabel | 38.1 | 22.175109  | 20.7853255 | 22.07453 | 25.74 | 24.2 | 24.997 |
| DM | Diabel | 38.5 | 23.3999182 | 19.1380922 | 19.19965 | 26.36 | 24.9 | 22.976 |
| DM | Diabel | 38.3 | 22.4683863 | 25.6675389 | 24.86013 | 25.54 | 25.1 | 36.358 |

|             |            |            |          |       |      |        |
|-------------|------------|------------|----------|-------|------|--------|
| <b>Mean</b> | 22.6363304 | 22.2668757 | 22.60268 | 25.09 | 24.5 | 30.354 |
| <b>SE</b>   | 0.26490031 | 1.44372464 | 1.283127 | 0.813 | 0.33 | 3.7027 |
| <b>CV</b>   | 2%         | 13%        | 11%      | 6%    | 3%   | 24%    |

|       |        |      |            |            |          |       |      |        |
|-------|--------|------|------------|------------|----------|-------|------|--------|
| DM-MQ | Diabel | 37.2 | 21.4774872 | 21.4962668 | 29.00184 | 23.34 | 23.4 | 32.801 |
| DM-MQ | Diabel | 36.4 | 24.1132278 | 30.3552671 | 36.19826 | 24.89 | 24.5 | 35.504 |
| DM-MQ | Diabel | 38.7 | 23.5302665 | 27.5938035 | 27.89066 | 22.04 | 27.1 | 32.606 |

|             |            |            |          |       |      |        |
|-------------|------------|------------|----------|-------|------|--------|
| <b>Mean</b> | 23.0403272 | 26.4817791 | 31.03025 | 23.42 | 25   | 33.637 |
| <b>SE</b>   | 0.79933566 | 2.61711803 | 2.603836 | 0.826 | 1.08 | 0.9353 |
| <b>CV</b>   | 6%         | 17%        | 15%      | 6%    | 7%   | 5%     |

|    |        |      |            |            |          |       |      |        |
|----|--------|------|------------|------------|----------|-------|------|--------|
| HF | High F | 37.5 | 27.38741   | 23.414038  | 21.10849 | 22.95 | 17.4 | 16.275 |
| HF | High F | 34.8 | 28.0573111 | 26.9674762 | 25.19691 | 22.08 | 25.3 | 18.622 |
| HF | High F | 31.8 | 31.2975409 | 29.9455459 | 26.45081 | 24.2  | 27.5 | 23.004 |
| HF | High F | 33.7 | 23.5952976 | 30.1194747 | 26.26128 | 23.63 | 22.7 | 20.925 |

|             |            |            |          |       |      |        |
|-------------|------------|------------|----------|-------|------|--------|
| <b>Mean</b> | 27.5843899 | 27.6116337 | 24.75437 | 23.21 | 23.3 | 19.707 |
| <b>SE</b>   | 1.58015831 | 1.57509684 | 1.246226 | 0.456 | 2.17 | 1.4524 |
| <b>CV</b>   | 11%        | 11%        | 10%      | 4%    | 19%  | 15%    |

|       |        |      |            |            |          |       |      |        |
|-------|--------|------|------------|------------|----------|-------|------|--------|
| HF-MQ | High F | 37.1 | 29.6352112 | 29.7330142 | 24.99394 | 25.75 | 24.4 | 26.422 |
| HF-MQ | High F | 39.8 | 29.1834787 | 25.4663269 | 19.62195 | 21.28 | 27.3 | 16.704 |
| HF-MQ | High F | 39.8 | 29.2779102 | 30.2203555 | 25.18173 | 22.11 | 26.3 | 24.58  |
| HF-MQ | High F | 35.8 | 26.3919033 | 25.5027772 | 24.57706 | 20.99 | 23.2 | 21.12  |

|             |            |            |          |       |      |        |
|-------------|------------|------------|----------|-------|------|--------|
| <b>Mean</b> | 28.6221259 | 27.7306184 | 23.59367 | 22.53 | 25.3 | 22.206 |
| <b>SE</b>   | 0.74974465 | 1.30059833 | 1.329922 | 1.098 | 0.92 | 2.1382 |
| <b>CV</b>   | 5%         | 9%         | 11%      | 10%   | 7%   | 19%    |

#### t-test

|                | Thymidine  | Tryptophan | Tyrosine | Uracil | Urea | Valine |
|----------------|------------|------------|----------|--------|------|--------|
| <b>DM/NC</b>   | 0.78398058 | 0.790161   | 0.944637 | 1.072  | 0.82 | 1.3819 |
| <b>P-value</b> | 0.00827334 | 0.02571287 | 0.530334 | 0.374  | 0.1  | 0.0699 |

|                |            |            |          |       |      |        |
|----------------|------------|------------|----------|-------|------|--------|
| <b>DM-MQ/</b>  | 0.7979725  | 0.93973081 | 1.296852 | 1.001 | 0.84 | 1.5314 |
| <b>P-value</b> | 0.03296169 | 0.56264716 | 0.053585 | 0.993 | 0.21 | 0.0003 |

|                |            |            |          |       |      |        |
|----------------|------------|------------|----------|-------|------|--------|
| <b>HF/NC</b>   | 0.95535035 | 0.97982476 | 1.034563 | 0.992 | 0.78 | 0.8972 |
| <b>P-value</b> | 0.58613266 | 0.79595619 | 0.688702 | 0.91  | 0.11 | 0.2338 |

|                |            |            |          |       |      |        |
|----------------|------------|------------|----------|-------|------|--------|
| <b>HF-MQ/</b>  | 0.99129101 | 0.98404704 | 0.986053 | 0.963 | 0.85 | 1.011  |
| <b>P-value</b> | 0.89094314 | 0.82139784 | 0.874233 | 0.662 | 0.17 | 0.9204 |

|                |            |            |          |       |      |        |
|----------------|------------|------------|----------|-------|------|--------|
| <b>DM- MQ/</b> | 1.01784727 | 1.18929029 | 1.372858 | 0.934 | 1.02 | 1.1081 |
| <b>P-value</b> | 0.60790083 | 0.18954262 | 0.02471  | 0.219 | 0.62 | 0.4939 |

|                |            |            |          |       |      |        |
|----------------|------------|------------|----------|-------|------|--------|
| <b>HF-MQ/</b>  | 1.03762041 | 1.00430923 | 0.953111 | 0.971 | 1.09 | 1.1269 |
| <b>P-value</b> | 0.57462949 | 0.95544124 | 0.547736 | 0.587 | 0.42 | 0.3708 |
